# Supplementary material for: Correlation of Somatostatin Receptor 1–5 Expression, [68Ga]Ga-DOTANOC, [18F]F-FDG PET/CT and Clinical Outcome in a Prospective Cohort of Pancreatic Neuroendocrine Neoplasms
Source: MDPI journal article supplement (doi:10.3390/cancers14010162), 2021-12-29
Supplement: s1 [file s1]

**Table S1.** Association between [<sup>68</sup>Ga]Ga-DOTANOC PET/CT and SSTR2 expression assessed by both membranous and overall expression.

|                                                           |             | SSTR2 Membranous Expression |                        |           |           |                                                           |             | SSTR2 Overall Score |                        |           |
|-----------------------------------------------------------|-------------|-----------------------------|------------------------|-----------|-----------|-----------------------------------------------------------|-------------|---------------------|------------------------|-----------|
|                                                           |             | score1                      | score2                 | score3    | score4    |                                                           |             | score1              | score2                 | score3    |
| [ <sup>68</sup> Ga]Ga-DOTANOC,<br><i>p</i> = 0.043        | positive, n | 0                           | 3                      | 10        | 9         | [ <sup>68</sup> Ga]Ga-DOTANOC,<br><i>p</i> = 0.043        | positive, n | 0                   | 3                      | 19        |
|                                                           | negative, n | 1                           | 0                      | 0         | 0         |                                                           | negative, n | 1                   | 0                      | 0         |
| [ <sup>68</sup> Ga]Ga-DOTANOC SUVmax,<br><i>p</i> = 0.334 | median      | 4.4                         | 23.8                   | 29.0      | 32.9      | [ <sup>68</sup> Ga]Ga-DOTANOC SUVmax,<br><i>p</i> = 0.236 | median      | 4.4                 | 23.8                   | 29.1      |
|                                                           | IQR         | 4.4                         | 13.3–93.3 <sup>a</sup> | 16.6–63.7 | 17.2–62.4 |                                                           | IQR         | 4.4                 | 13.3–93.3 <sup>a</sup> | 17.0–53.5 |
|                                                           | n           | 1                           | 3                      | 10        | 9         |                                                           | n           | 1                   | 3                      | 19        |

<sup>a</sup>range, due to the inability to define interquartile range, IQR.
